# Supplementary material for: Consumers attitudes toward animal welfare friendly produce: An island of Ireland study
Source: Frontiers journal article supplement (doi:10.3389/fanim.2022.930930), 2022-09-05
Supplement: Data_Sheet_1.pdf [file Data_Sheet_1.pdf]

## Supplementary Material

**Table S1** Final cluster centres of the two principal components (PC), as derived from the k-means cluster analysis for the classification of the 972 respondents

|                        | Struggling | Indifferent | Engaged |
|------------------------|------------|-------------|---------|
| Opportunity/Capability | -1.88      | 0.35        | 0.18    |
| Motivation             | -0.19      | -0.39       | 1.81    |

**Table S2** Sociodemographic characteristics of the three clusters (S = Struggling; I = Indifferent; E = Engaged)

|         | %                  | S                  | I                 | E                 | %   | S     | I                 | E                  |                    |
|---------|--------------------|--------------------|-------------------|-------------------|-----|-------|-------------------|--------------------|--------------------|
| Country | ROI                | 81.4 <sub>a</sub>  | 70.2 <sub>b</sub> | 63.1 <sub>b</sub> | Age | 18-24 | 2.1 <sub>a</sub>  | 6.7 <sub>a,b</sub> | 10.6 <sub>b</sub>  |
|         | NI                 | 18.6 <sub>a</sub>  | 29.0 <sub>b</sub> | 36.9 <sub>b</sub> |     | 25-34 | 17.9 <sub>a</sub> | 21.1 <sub>a</sub>  | 21.30 <sub>a</sub> |
| Gender  | Male               | 48.6 <sub>a</sub>  | 48.8 <sub>a</sub> | 31.3 <sub>b</sub> |     | 35-44 | 23.0 <sub>a</sub> | 24.1 <sub>a</sub>  | 28.1 <sub>a</sub>  |
|         | Female             | 51.4 <sub>a</sub>  | 51.2 <sub>a</sub> | 68.8 <sub>b</sub> |     | 45-54 | 22.9 <sub>a</sub> | 18.8 <sub>a</sub>  | 15.6 <sub>a</sub>  |
| Parent  | Yes                | 39.3 <sub>a</sub>  | 43.0 <sub>a</sub> | 57.5 <sub>b</sub> |     | 55-64 | 18.6 <sub>a</sub> | 14.6 <sub>a</sub>  | 16.9 <sub>a</sub>  |
|         | No                 | 60.70 <sub>a</sub> | 57.0 <sub>a</sub> | 42.5 <sub>b</sub> |     | 65+   | 15.0 <sub>a</sub> | 14.7 <sub>a</sub>  | 7.5 <sub>a</sub>   |
| Married | Prefer not to say  | 0.7 <sub>a</sub>   | 0.1 <sub>a</sub>  | 0.0 <sub>a</sub>  |     |       |                   |                    |                    |
|         | Not married        | 39.3 <sub>a</sub>  | 43.8 <sub>a</sub> | 56.9 <sub>b</sub> |     |       |                   |                    |                    |
|         | Married            | 51.4 <sub>a</sub>  | 48.2 <sub>a</sub> | 38.8 <sub>a</sub> |     |       |                   |                    |                    |
|         | Previously married | 8.6 <sub>a</sub>   | 7.9 <sub>a</sub>  | 4.4 <sub>a</sub>  |     |       |                   |                    |                    |

**Table S3 Meat consumption frequency of the three clusters (S = Struggling; I = Indifferent; E = Engaged)**

|         | %                    | S                 | I                 | E                 |       | %                    | S                 | I                 | E                 |
|---------|----------------------|-------------------|-------------------|-------------------|-------|----------------------|-------------------|-------------------|-------------------|
| Beef    | Never                | 57.1 <sub>a</sub> | 18.6 <sub>b</sub> | 13.8 <sub>b</sub> | Pork  | Never                | 62.9 <sub>a</sub> | 24.0 <sub>b</sub> | 26.3 <sub>b</sub> |
|         | < once a year        | 8.6 <sub>a</sub>  | 6.7 <sub>a</sub>  | 1.3 <sub>a</sub>  |       | < once a year        | 10.7 <sub>a</sub> | 7.3 <sub>a</sub>  | 3.1 <sub>a</sub>  |
|         | Once or twice a year | 4.3 <sub>a</sub>  | 7.7 <sub>a</sub>  | 2.5 <sub>a</sub>  |       | Once or twice a year | 7.9 <sub>a</sub>  | 11.6 <sub>a</sub> | 8.1 <sub>a</sub>  |
|         | Every few months     | 15.0 <sub>a</sub> | 24.0 <sub>a</sub> | 18.1 <sub>a</sub> |       | Every few months     | 12.9 <sub>a</sub> | 27.1 <sub>a</sub> | 23.1 <sub>a</sub> |
|         | 1-4 times a month    | 8.6 <sub>a</sub>  | 33.3 <sub>b</sub> | 44.4 <sub>b</sub> |       | 1-4 times a month    | 2.1 <sub>a</sub>  | 25.3 <sub>b</sub> | 28.1 <sub>b</sub> |
|         | A few times a week   | 6.4 <sub>a</sub>  | 9.1 <sub>a</sub>  | 16.9 <sub>b</sub> |       | A few times a week   | 2.9 <sub>a</sub>  | 4.3 <sub>a</sub>  | 7.5 <sub>a</sub>  |
|         | Daily                | 0.0 <sub>a</sub>  | 0.6 <sub>a</sub>  | 3.1 <sub>b</sub>  |       | Daily                | 0.7 <sub>a</sub>  | 0.4 <sub>a</sub>  | 3.8 <sub>b</sub>  |
| Chicken | Never                | 51.4 <sub>a</sub> | 15.2 <sub>b</sub> | 11.9 <sub>b</sub> | Dairy | Never                | 60.0 <sub>a</sub> | 17.6 <sub>b</sub> | 11.3 <sub>b</sub> |
|         | < once a year        | 11.4 <sub>a</sub> | 4.3 <sub>b</sub>  | 1.9 <sub>b</sub>  |       | < once a year        | 7.1 <sub>a</sub>  | 5.2 <sub>a</sub>  | 1.3 <sub>a</sub>  |
|         | Once or twice a year | 3.6 <sub>a</sub>  | 8.5 <sub>a</sub>  | 3.8 <sub>a</sub>  |       | Once or twice a year | 4.3 <sub>a</sub>  | 6.8 <sub>a</sub>  | 1.3 <sub>a</sub>  |
|         | Every few months     | 13.6 <sub>a</sub> | 24.3 <sub>b</sub> | 11.9 <sub>a</sub> |       | Every few months     | 13.6 <sub>a</sub> | 20.7 <sub>a</sub> | 12.5 <sub>a</sub> |
|         | 1-4 times a month    | 17.9 <sub>a</sub> | 36.9 <sub>b</sub> | 43.8 <sub>b</sub> |       | 1-4 times a month    | 5.7 <sub>a</sub>  | 29.8 <sub>b</sub> | 33.1 <sub>b</sub> |
|         | A few times a week   | 2.1 <sub>a</sub>  | 10.3 <sub>b</sub> | 22.5 <sub>c</sub> |       | A few times a week   | 8.6 <sub>a</sub>  | 17.7 <sub>b</sub> | 32.5 <sub>c</sub> |
|         | Daily                | 0.0 <sub>a</sub>  | 0.6 <sub>a</sub>  | 4.4 <sub>b</sub>  |       | Daily                | 0.7 <sub>a</sub>  | 2.2 <sub>a</sub>  | 8.1 <sub>b</sub>  |
| Eggs    | Never                | 45.0 <sub>a</sub> | 13.8 <sub>b</sub> | 4.4 <sub>c</sub>  |       |                      |                   |                   |                   |
|         | < once a year        | 5.0 <sub>a</sub>  | 4.5 <sub>a</sub>  | 0.0 <sub>a</sub>  |       |                      |                   |                   |                   |
|         | Once or twice a year | 5.7 <sub>a</sub>  | 6.4 <sub>a</sub>  | 0.6 <sub>a</sub>  |       |                      |                   |                   |                   |
|         | Every few months     | 7.9 <sub>a</sub>  | 17.0 <sub>a</sub> | 8.8 <sub>a</sub>  |       |                      |                   |                   |                   |
|         | 1-4 times a month    | 23.6 <sub>a</sub> | 42.3 <sub>b</sub> | 50.0 <sub>b</sub> |       |                      |                   |                   |                   |
|         | A few times a week   | 12.1 <sub>a</sub> | 14.1 <sub>a</sub> | 30.0 <sub>b</sub> |       |                      |                   |                   |                   |
|         | Daily                | 0.7 <sub>a</sub>  | 1.9 <sub>a</sub>  | 6.3 <sub>b</sub>  |       |                      |                   |                   |                   |

**Table S4 Cluster motivation to purchase FAW friendly foods (S = Struggling; I = Indifferent; E = Engaged)**

|                                                                                  | %                 | S                 | I                 | E |                                                                            | S                 | I                 | E |
|----------------------------------------------------------------------------------|-------------------|-------------------|-------------------|---|----------------------------------------------------------------------------|-------------------|-------------------|---|
| I always try to locate animal welfare friendly food where possible               |                   |                   |                   |   | I would rather eat animal welfare friendly food than conventional products |                   |                   |   |
| Strongly disagree                                                                | 7.1 <sub>a</sub>  | 1.8 <sub>b</sub>  | 0.0 <sub>b</sub>  |   | 5.0 <sub>a</sub>                                                           | 1.5 <sub>b</sub>  | 0.0 <sub>b</sub>  |   |
| Disagree                                                                         | 20.0 <sub>a</sub> | 11.6 <sub>b</sub> | 0.0 <sub>c</sub>  |   | 5.7 <sub>a</sub>                                                           | 6.1 <sub>a</sub>  | 0.0 <sub>b</sub>  |   |
| Neutral                                                                          | 48.6 <sub>a</sub> | 40.9 <sub>a</sub> | 3.8 <sub>b</sub>  |   | 25.0 <sub>a</sub>                                                          | 31.8 <sub>a</sub> | 1.9 <sub>b</sub>  |   |
| Agree                                                                            | 22.1 <sub>a</sub> | 43.2 <sub>b</sub> | 26.3 <sub>a</sub> |   | 41.4 <sub>a</sub>                                                          | 54.2 <sub>b</sub> | 10.0 <sub>c</sub> |   |
| Strongly agree                                                                   | 2.1 <sub>a</sub>  | 2.5 <sub>a</sub>  | 70.0 <sub>b</sub> |   | 22.9 <sub>a</sub>                                                          | 6.4 <sub>b</sub>  | 88.1 <sub>c</sub> |   |
| I would pay more for animal welfare friendly food than for conventional products |                   |                   |                   |   | I would source animal welfare friendly food if it were available           |                   |                   |   |
| Strongly disagree                                                                | 7.1 <sub>a</sub>  | 1.9 <sub>b</sub>  | 0.0 <sub>b</sub>  |   | 5.7 <sub>a</sub>                                                           | 1.6 <sub>b</sub>  | 0.0 <sub>b</sub>  |   |
| Disagree                                                                         | 15.7 <sub>a</sub> | 12.8 <sub>a</sub> | 0.0 <sub>b</sub>  |   | 5.0 <sub>a</sub>                                                           | 4.3 <sub>a</sub>  | 0.0 <sub>a</sub>  |   |
| Neutral                                                                          | 28.6 <sub>a</sub> | 33.8 <sub>a</sub> | 3.8 <sub>b</sub>  |   | 30.0 <sub>a</sub>                                                          | 30.2 <sub>a</sub> | 0.0 <sub>b</sub>  |   |
| Agree                                                                            | 37.1 <sub>a</sub> | 49.9 <sub>b</sub> | 19.4 <sub>c</sub> |   | 42.1 <sub>a</sub>                                                          | 60.4 <sub>b</sub> | 13.1 <sub>c</sub> |   |
| Strongly agree                                                                   | 11.4 <sub>a</sub> | 1.6 <sub>b</sub>  | 76.9 <sub>c</sub> |   | 17.1 <sub>a</sub>                                                          | 3.4 <sub>b</sub>  | 86.9 <sub>c</sub> |   |

**Table S5 Cluster perceptions towards their opportunity and capability to purchase FAW friendly foods (S = Struggling; I = Indifferent; E = Engaged)**

|                   | % | S                                                                  | I                 | E                 |  | S                                                                    | I                 | E                 |  | S                                                                    | I                 | E                 |
|-------------------|---|--------------------------------------------------------------------|-------------------|-------------------|--|----------------------------------------------------------------------|-------------------|-------------------|--|----------------------------------------------------------------------|-------------------|-------------------|
|                   |   | I find it easy to identify animal welfare friendly food            |                   |                   |  | I know where to buy animal welfare friendly food                     |                   |                   |  | There is a sufficient choice of animal welfare friendly food         |                   |                   |
| Strongly disagree |   | 83.6 <sub>a</sub>                                                  | 1.6 <sub>b</sub>  | 8.1 <sub>c</sub>  |  | 78.6 <sub>a</sub>                                                    | 2.7 <sub>b</sub>  | 3.1 <sub>b</sub>  |  | 72.1 <sub>a</sub>                                                    | 1.0 <sub>b</sub>  | 19.4 <sub>c</sub> |
| Disagree          |   | 14.3 <sub>a</sub>                                                  | 36.5 <sub>b</sub> | 29.4 <sub>b</sub> |  | 15.0 <sub>a</sub>                                                    | 29.5 <sub>b</sub> | 16.9 <sub>a</sub> |  | 15.7 <sub>a</sub>                                                    | 32.7 <sub>b</sub> | 34.4 <sub>b</sub> |
| Neutral           |   | 0.7 <sub>a</sub>                                                   | 33.9 <sub>b</sub> | 20.6 <sub>c</sub> |  | 3.6 <sub>a</sub>                                                     | 32.1 <sub>b</sub> | 26.9 <sub>b</sub> |  | 11.4 <sub>a</sub>                                                    | 41.1 <sub>b</sub> | 18.8 <sub>a</sub> |
| Agree             |   | 0.7 <sub>a</sub>                                                   | 25.3 <sub>b</sub> | 26.9 <sub>b</sub> |  | 2.9 <sub>a</sub>                                                     | 32.9 <sub>b</sub> | 35.0 <sub>b</sub> |  | 0.7 <sub>a</sub>                                                     | 23.1 <sub>b</sub> | 14.4 <sub>c</sub> |
| Strongly agree    |   | 0.7 <sub>a</sub>                                                   | 2.7 <sub>a</sub>  | 15.0 <sub>b</sub> |  | 0.0 <sub>a</sub>                                                     | 2.8 <sub>a</sub>  | 18.1 <sub>b</sub> |  | 0.0 <sub>a</sub>                                                     | 2.1 <sub>a</sub>  | 13.1 <sub>b</sub> |
|                   |   | There is sufficient information about animal welfare friendly food |                   |                   |  | Animal welfare friendly products are easily available in food stores |                   |                   |  | It is easy to identify animal welfare-friendly products using labels |                   |                   |
| Strongly disagree |   | 89.3 <sub>a</sub>                                                  | 3.7 <sub>b</sub>  | 24.4 <sub>c</sub> |  | 67.9 <sub>a</sub>                                                    | 1.0 <sub>b</sub>  | 11.3 <sub>c</sub> |  | 77.1 <sub>a</sub>                                                    | 1.5 <sub>b</sub>  | 2.5 <sub>b</sub>  |
| Disagree          |   | 9.3 <sub>a</sub>                                                   | 43.3 <sub>b</sub> | 33.1 <sub>b</sub> |  | 25.7 <sub>a</sub>                                                    | 31.8 <sub>a</sub> | 30.0 <sub>a</sub> |  | 18.6 <sub>a</sub>                                                    | 28.6 <sub>a</sub> | 30.0 <sub>a</sub> |
| Neutral           |   | 0.7 <sub>a</sub>                                                   | 30.4 <sub>b</sub> | 14.4 <sub>c</sub> |  | 5.7 <sub>a</sub>                                                     | 40.6 <sub>b</sub> | 26.9 <sub>c</sub> |  | 3.6 <sub>a</sub>                                                     | 35.0 <sub>b</sub> | 20.0 <sub>c</sub> |
| Agree             |   | 0.0 <sub>a</sub>                                                   | 20.1 <sub>b</sub> | 16.9 <sub>b</sub> |  | 0.7 <sub>a</sub>                                                     | 24.0 <sub>b</sub> | 19.4 <sub>b</sub> |  | 0.7 <sub>a</sub>                                                     | 32.3 <sub>b</sub> | 30.0 <sub>b</sub> |
| Strongly agree    |   | 0.7 <sub>a</sub>                                                   | 2.5 <sub>a</sub>  | 11.3 <sub>b</sub> |  | 0.0 <sub>a</sub>                                                     | 2.5 <sub>a</sub>  | 12.5 <sub>b</sub> |  | 0.0 <sub>a</sub>                                                     | 2.7 <sub>a</sub>  | 17.5 <sub>b</sub> |

**Table S6 Cluster sector specific assessments of current FAW conditions (S = Struggling; I = Indifferent; E = Engaged)**

|      | %            | S                 | I                 | E                  |         | S                 | I                   | E                   |     | S                 | I                 | E                   |
|------|--------------|-------------------|-------------------|--------------------|---------|-------------------|---------------------|---------------------|-----|-------------------|-------------------|---------------------|
| Beef | Very Poor    | 5.0 <sub>a</sub>  | 0.6 <sub>b</sub>  | 2.5 <sub>a,b</sub> | Chicken | 13.6 <sub>a</sub> | 2.70 <sub>b</sub>   | 9.40 <sub>a</sub>   | Egg | 10.7 <sub>a</sub> | 1.3 <sub>b</sub>  | 7.5 <sub>a</sub>    |
|      | Poor         | 5.7 <sub>a</sub>  | 1.9 <sub>a</sub>  | 5.0 <sub>a</sub>   |         | 18.6 <sub>a</sub> | 9.7 <sub>b</sub>    | 12.5 <sub>a,b</sub> |     | 17.9 <sub>a</sub> | 7.9 <sub>b</sub>  | 12.5 <sub>a,b</sub> |
|      | Moderate     | 12.9 <sub>a</sub> | 14.0 <sub>a</sub> | 14.4 <sub>a</sub>  |         | 22.1 <sub>a</sub> | 27.7 <sub>a</sub>   | 26.3 <sub>a</sub>   |     | 22.1 <sub>a</sub> | 22.3 <sub>a</sub> | 22.5 <sub>a</sub>   |
|      | Good         | 32.9 <sub>a</sub> | 35.1 <sub>a</sub> | 35.0 <sub>a</sub>  |         | 18.6 <sub>a</sub> | 32.0 <sub>b</sub>   | 18.1 <sub>a</sub>   |     | 23.6 <sub>a</sub> | 35.3 <sub>b</sub> | 20.6 <sub>a</sub>   |
|      | Very Good    | 30.7 <sub>a</sub> | 39.0 <sub>a</sub> | 33.8 <sub>a</sub>  |         | 8.6 <sub>a</sub>  | 16.5 <sub>a</sub>   | 23.8 <sub>a</sub>   |     | 11.4 <sub>a</sub> | 22.8 <sub>b</sub> | 26.9 <sub>b</sub>   |
|      | I don't know | 12.9 <sub>a</sub> | 9.4 <sub>a</sub>  | 9.4 <sub>a</sub>   |         | 18.6 <sub>a</sub> | 11.5 <sub>a</sub>   | 10.0 <sub>a</sub>   |     | 14.3 <sub>a</sub> | 10.4 <sub>a</sub> | 10.0 <sub>a</sub>   |
| Pork | Very Poor    | 8.6 <sub>a</sub>  | 0.7 <sub>b</sub>  | 9.4 <sub>a</sub>   | Dairy   | 2.1 <sub>a</sub>  | 0.1 <sub>b</sub>    | 3.1 <sub>a</sub>    |     |                   |                   |                     |
|      | Poor         | 12.1 <sub>a</sub> | 6.0 <sub>a</sub>  | 10.6 <sub>a</sub>  |         | 5.0 <sub>a</sub>  | 2.7 <sub>a</sub>    | 0.6 <sub>a</sub>    |     |                   |                   |                     |
|      | Moderate     | 15.7 <sub>a</sub> | 22.5 <sub>a</sub> | 20.0 <sub>a</sub>  |         | 17.9 <sub>a</sub> | 13.1 <sub>a</sub>   | 15.6 <sub>a</sub>   |     |                   |                   |                     |
|      | Good         | 35.7 <sub>a</sub> | 36.3 <sub>a</sub> | 25.0 <sub>a</sub>  |         | 32.9 <sub>a</sub> | 37.6 <sub>a</sub>   | 30.0 <sub>a</sub>   |     |                   |                   |                     |
|      | Very Good    | 8.6 <sub>a</sub>  | 19.6 <sub>b</sub> | 19.4 <sub>b</sub>  |         | 28.6 <sub>a</sub> | 38.2 <sub>a,b</sub> | 41.9 <sub>b</sub>   |     |                   |                   |                     |
|      | Don't know   | 19.3 <sub>a</sub> | 14.9 <sub>a</sub> | 15.6 <sub>a</sub>  |         | 13.6 <sub>a</sub> | 8.2 <sub>a</sub>    | 8.8 <sub>a</sub>    |     |                   |                   |                     |

**Table S7 Cluster sector specific assessments of whether FAW conditions have improved in the past decade (S = Struggling; I = Indifferent; E = Engaged)**

|      | %                     | S                  | I                 | E                 |         | S                  | I                 | E                   |     | S                 | I                 | E                   |
|------|-----------------------|--------------------|-------------------|-------------------|---------|--------------------|-------------------|---------------------|-----|-------------------|-------------------|---------------------|
| Beef | Much worse            | 0.7 <sub>a,b</sub> | 0.4 <sub>b</sub>  | 2.5 <sub>a</sub>  | Chicken | 6.4 <sub>a</sub>   | 1.3 <sub>b</sub>  | 6.3 <sub>a</sub>    | Egg | 2.9 <sub>a</sub>  | 0.6 <sub>b</sub>  | 4.4 <sub>a</sub>    |
|      | Somewhat worse        | 7.1 <sub>a</sub>   | 3.3 <sub>a</sub>  | 3.8 <sub>a</sub>  |         | 14.3 <sub>a</sub>  | 7.7 <sub>a</sub>  | 9.4 <sub>a</sub>    |     | 16.4 <sub>a</sub> | 5.2 <sub>b</sub>  | 6.3 <sub>b</sub>    |
|      | The same              | 29.3 <sub>a</sub>  | 23.4 <sub>a</sub> | 27.5 <sub>a</sub> |         | 36.4 <sub>a</sub>  | 26.0 <sub>a</sub> | 20.6 <sub>a</sub>   |     | 32.1 <sub>a</sub> | 25.9 <sub>a</sub> | 18.1 <sub>a</sub>   |
|      | Improved              |                    |                   |                   |         |                    |                   |                     |     |                   |                   |                     |
|      | somewhat              | 31.4 <sub>a</sub>  | 38.7 <sub>a</sub> | 30.0 <sub>a</sub> |         | 19.3 <sub>a</sub>  | 37.1 <sub>b</sub> | 29.4 <sub>a,b</sub> |     | 24.3 <sub>a</sub> | 39.4 <sub>b</sub> | 32.5 <sub>a,b</sub> |
|      | Improved a great deal | 18.6 <sub>a</sub>  | 24.0 <sub>a</sub> | 26.9 <sub>a</sub> |         | 7.9 <sub>a</sub>   | 16.7 <sub>b</sub> | 23.8 <sub>b</sub>   |     | 10.0 <sub>a</sub> | 17.4 <sub>a</sub> | 28.7 <sub>b</sub>   |
|      | I don't know          | 12.9 <sub>a</sub>  | 10.3 <sub>a</sub> | 9.4 <sub>a</sub>  |         | 15.7 <sub>a</sub>  | 11.2 <sub>a</sub> | 10.6 <sub>a</sub>   |     | 14.3 <sub>a</sub> | 11.5 <sub>a</sub> | 10.0 <sub>a</sub>   |
| Pork | Much worse            | 2.1 <sub>a,b</sub> | 1.0 <sub>b</sub>  | 5.0 <sub>a</sub>  | Dairy   | 0.0 <sub>a,b</sub> | 0.6 <sub>b</sub>  | 3.1 <sub>a</sub>    |     |                   |                   |                     |
|      | Somewhat worse        | 14.3 <sub>a</sub>  | 5.8 <sub>b</sub>  | 10.0 <sub>a</sub> |         | 7.1 <sub>a</sub>   | 3.1 <sub>a</sub>  | 3.8 <sub>a</sub>    |     |                   |                   |                     |
|      | The same              | 30.0 <sub>a</sub>  | 27.7 <sub>a</sub> | 27.5 <sub>a</sub> |         | 24.3 <sub>a</sub>  | 22.5 <sub>a</sub> | 21.3 <sub>a</sub>   |     |                   |                   |                     |
|      | Improved              |                    |                   |                   |         |                    |                   |                     |     |                   |                   |                     |
|      | somewhat              | 27.1 <sub>a</sub>  | 34.5 <sub>a</sub> | 25.6 <sub>a</sub> |         | 39.3 <sub>a</sub>  | 36.6 <sub>a</sub> | 29.4 <sub>a</sub>   |     |                   |                   |                     |
|      | Improved a great deal | 9.3 <sub>a</sub>   | 17.4 <sub>a</sub> | 18.1 <sub>a</sub> |         | 16.4 <sub>a</sub>  | 27.5 <sub>b</sub> | 33.1 <sub>b</sub>   |     |                   |                   |                     |
|      | I don't know          | 17.1 <sub>a</sub>  | 13.5 <sub>a</sub> | 13.8 <sub>a</sub> |         | 12.9 <sub>a</sub>  | 9.7 <sub>a</sub>  | 9.4 <sub>a</sub>    |     |                   |                   |                     |
